# Supplementary material for: Autophagosomal Syntaxin17-dependent lysosomal degradation maintains neuronal function in Drosophila
Source: PubMed Central journal article supplement — J Cell Biol. 2013 May 13;201(4):531–9. doi: 10.1083/jcb.201211160 (PMC3653357; doi:10.1083/jcb.201211160), 2013-05-13
Supplement: supp_jcb.201211160_JCB_201211160_sm.pdf [file supp_jcb.201211160_JCB_201211160_sm.pdf]

Takáts et al., <http://www.jcb.org/cgi/content/full/jcb.201211160/DC1>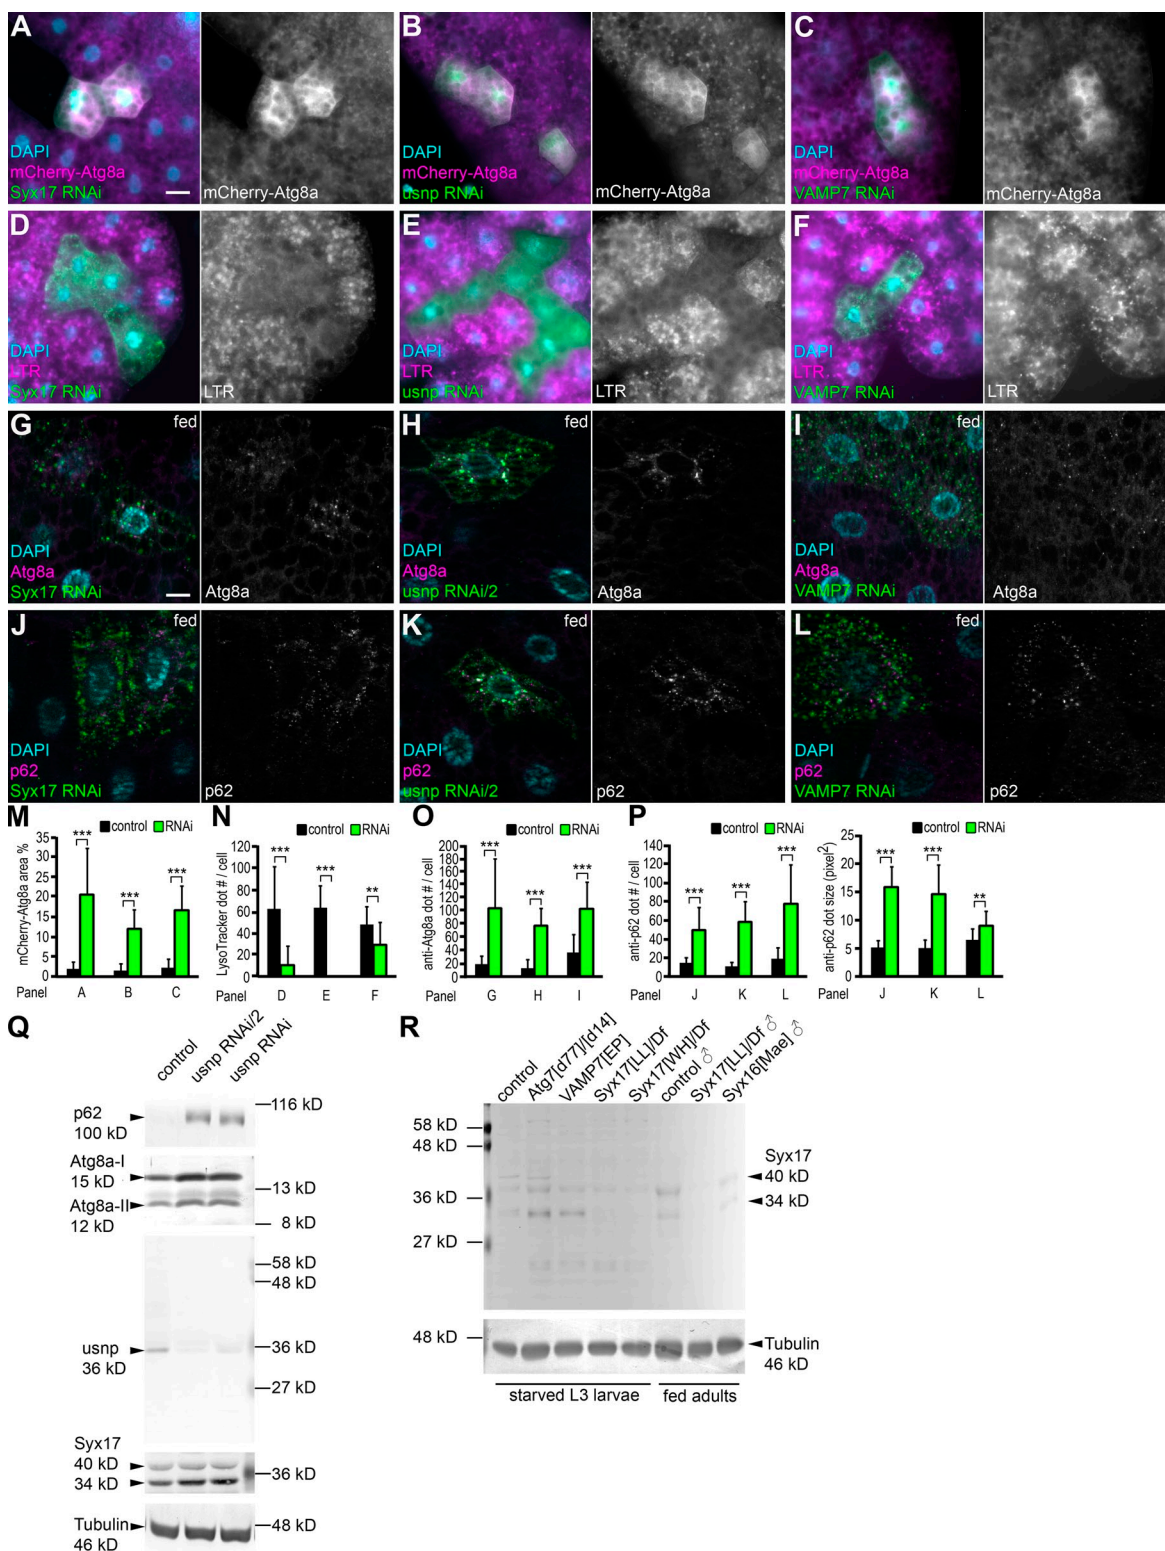

Figure S1. *Syx17*, *usnp*, and *VAMP7* are required for developmental and basal autophagy. (A–C) Knockdown of *Syx17* (A), *usnp* (B), or *VAMP7* (C) in GFP-marked fat body cells results in large-scale accumulation of small mCherry-Atg8a dots in wandering L3 stage larvae. (D–F) *Syx17* (D), *usnp* (E), or *VAMP7* (F) RNAi blocks LysoTracker dot formation in wandering animals. (G–I) Atg8a-positive autophagosomes accumulate in *Syx17* (G), *usnp* (H), and *VAMP7* (I) RNAi cells marked by LAMP1-GFP compared with adjacent control fat body cells in well-fed larvae. (J–L) Accumulation of p62 aggregates is obvious in *Syx17* (J), *usnp* (K), and *VAMP7* (L)-depleted fat cells in well-fed larvae. (M–P) Quantification of data shown in A–C (M), D–F (N), G–I (O), and J–L (P).  $n = 10$  for all genotypes. Error bars mark SDs. \*\*,  $P < 0.01$ ; \*\*\*,  $P < 0.001$ . (Q) Systemic RNAi silencing of *usnp* mediated by *Actin-Gal4* results in accumulation of p62 and Atg8a-II in Western blots of L3 stage larval lysates. Anti-*usnp* blot reveals that *usnp* levels are strongly decreased in *usnp* RNAi animals, whereas *Syx17* expression is largely unaffected. (R) Western blot analysis of larval and adult samples shows the specificity of guinea pig anti-*Syx17* antisera. Bars: (A for A–F) 40  $\mu\text{m}$ ; (G for G–L) 20  $\mu\text{m}$ .

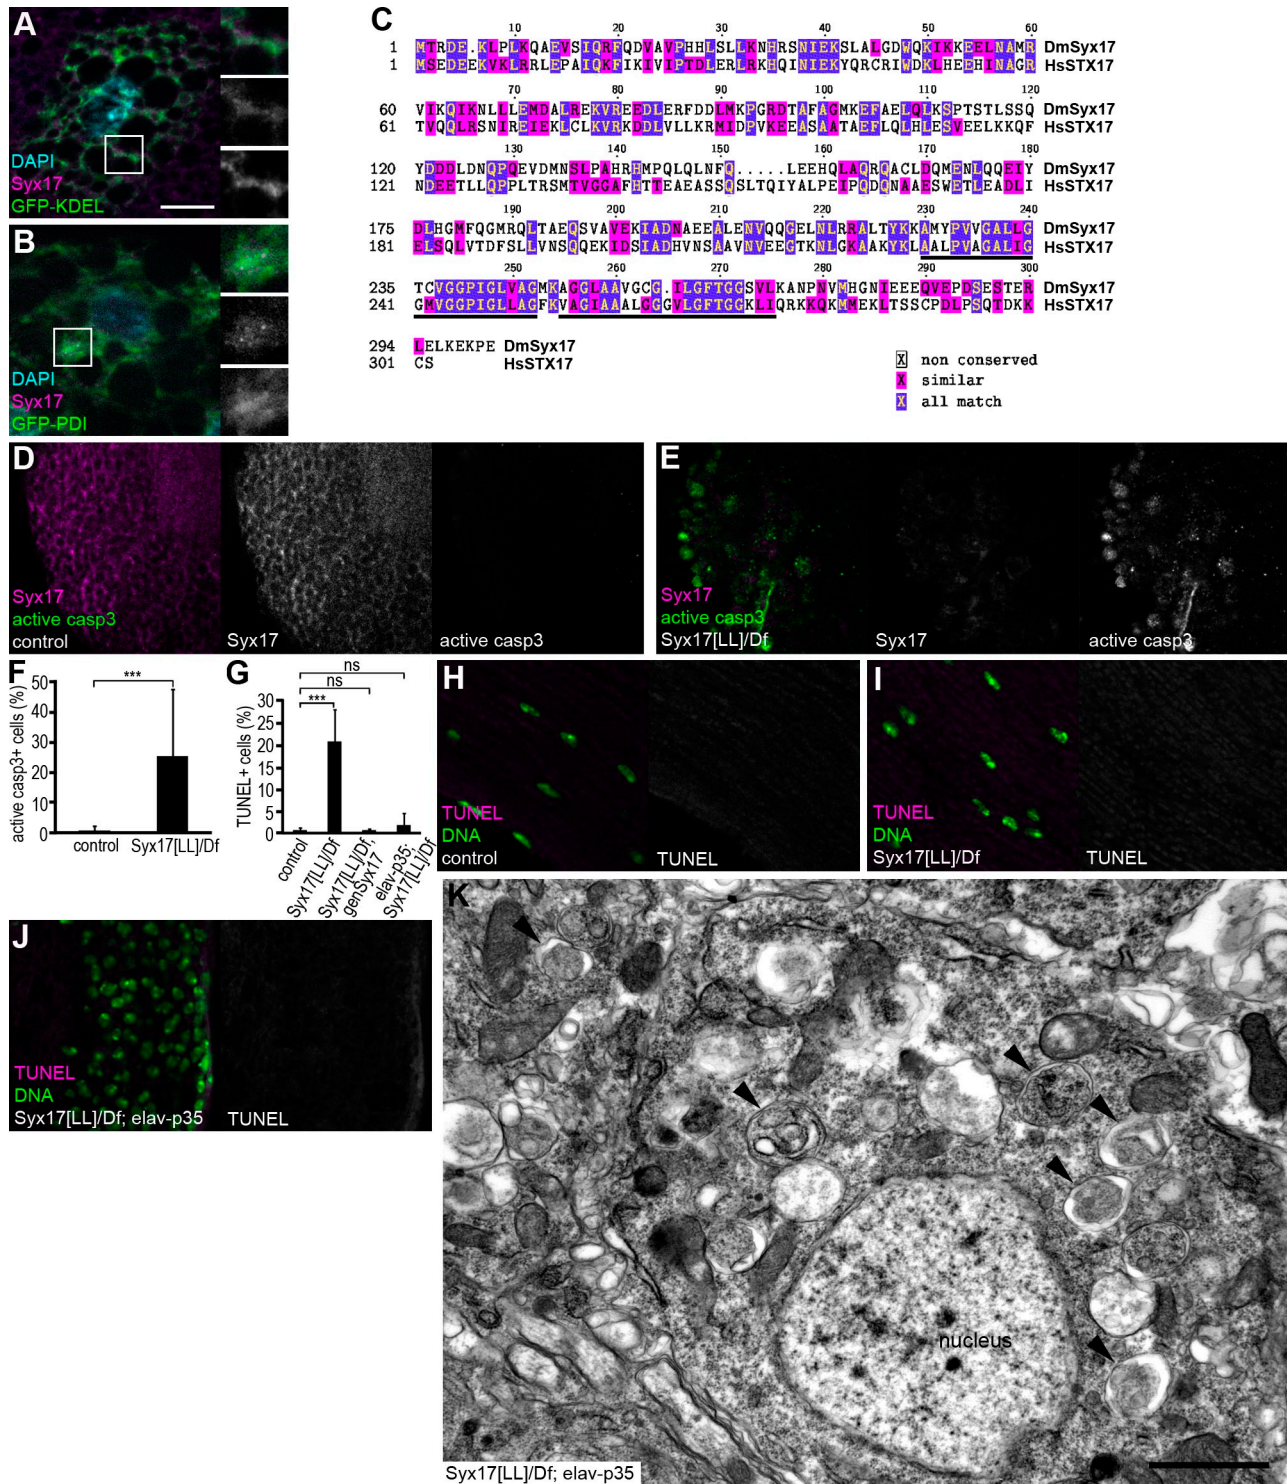

Figure S2. **Additional Syx17 data.** (A and B) Endogenous Syx17 localizes to the region of the ER, marked by GFP-KDEL (A) and GFP-protein disulphide isomerase (B). Insets show merged images (top), Syx17 channels (middle), and relevant green channels (bottom) enlarged from boxed areas in A and B. (C) CLUSTALW alignment of *Drosophila* Syx17 and human STX17. Predicted conserved transmembrane domains are underlined. (D and E) No cleaved caspase 3 labeling is detected in brains of control flies (D). Numerous cells are marked by active caspase 3 immunoreactivity, whereas no specific anti-Syx17 staining is detected in Syx17 mutant brains (E). (F and G) Quantification of data shown in D and E (F) and J (this figure) and Fig. 5 (I-K) (G).  $n = 8$  for all genotypes summarized in panels F and G. Error bars mark SDs. \*\*\*,  $P < 0.001$ . (H and I) TUNEL labeling is almost never seen in adult flight muscles of 2-d-old control animals (H; 2/342 muscle cell nuclei were positive) or in muscles of Syx17 mutant animals (I; 4/611 nuclei were positive).  $n = 3$  for both genotypes. (J) TUNEL staining is suppressed by neuron-specific expression of p35 in 2-d-old Syx17 mutant adult brains. (K) Autophagosomes (marked by arrowheads) accumulate in brains of 2-d-old Syx17 mutant adults that express the caspase inhibitor p35 in neurons. Bars: (A for A, B, D, E, and H-J) 20  $\mu\text{m}$ ; (K) 1  $\mu\text{m}$ .

Table S1. List of *Drosophila* homologues of human and yeast SNARE proteins, RNAi and mutant lines for these genes used in this study, and the results of our small-scale RNAi screen

| Human      | Yeast       | <i>Drosophila</i>       | CG number | Strains used                                                                                         | Referred to as                                                 | Source                                                     | mCherry-Atg8a RNAi phenotype                                                                         |
|------------|-------------|-------------------------|-----------|------------------------------------------------------------------------------------------------------|----------------------------------------------------------------|------------------------------------------------------------|------------------------------------------------------------------------------------------------------|
| Syntaxin1  | Sso1p/Sso2p | Syntaxin1A              | CG31136   | JF01829<br>33112                                                                                     |                                                                | BDSC/TRiP<br>VDRC                                          | No effect<br>No effect                                                                               |
| Syntaxin2  |             |                         |           |                                                                                                      |                                                                |                                                            |                                                                                                      |
| Syntaxin3  |             |                         |           |                                                                                                      |                                                                |                                                            |                                                                                                      |
| Syntaxin4  |             | Syntaxin4               | CG2715    | 102466                                                                                               |                                                                | VDRC                                                       | No effect                                                                                            |
| Syntaxin5  | Sed5p       | Syntaxin5               | CG4214    | 108928                                                                                               |                                                                | VDRC                                                       | Enhancement                                                                                          |
| Syntaxin6  | Tlg1p       | Syntaxin6               | CG7736    | 104795                                                                                               |                                                                | VDRC                                                       | No effect                                                                                            |
| Syntaxin7  | Pep12p      | Avalanche/<br>Syntaxin7 | CG5081    | 107264                                                                                               |                                                                | VDRC                                                       | Suppression                                                                                          |
| Syntaxin8  | Syn8p       | Syntaxin8               | CG4109    | JF02436<br>107014                                                                                    |                                                                | BDSC/TRiP<br>VDRC                                          | Suppression<br>No effect                                                                             |
| Syntaxin10 |             |                         |           |                                                                                                      |                                                                |                                                            |                                                                                                      |
| Syntaxin11 |             |                         |           |                                                                                                      |                                                                |                                                            |                                                                                                      |
| Syntaxin12 |             | Syntaxin13              | CG11278   | 102432                                                                                               |                                                                | VDRC                                                       | No effect                                                                                            |
| Syntaxin16 | Tlg2p       | Syntaxin16              | CG1467    | 109504<br>JF01924                                                                                    |                                                                | VDRC<br>BDSC/TRiP                                          | No effect<br>No effect                                                                               |
| Syntaxin17 |             | Syntaxin17              | CG7452    | UAS.6.11}G1176<br>JF01937<br>PBac{WH}Syx17{[03584]<br>PBac{SAstop<br>DsRed}LL06330<br>Df(3L)Exel8098 | Syx16[Mae]<br>Syx17 RNAi<br>Syx17[WH]<br>Syx17[LL]<br>Syx17 Df | BDSC<br>BDSC/TRiP<br>Harvard<br>Collection<br>DGRC<br>BDSC | Small perinuclear dots<br>Small perinuclear dots<br>Small perinuclear dots<br>Small perinuclear dots |
| Syntaxin18 | Ufe1p       | Syntaxin18              | CG13626   | 105113                                                                                               |                                                                | VDRC                                                       | Enhancement                                                                                          |
| SNAP-23    | Sec9p       | SNAP-25                 | CG40452   | JF02615                                                                                              |                                                                | BDSC/TRiP                                                  | No effect                                                                                            |
| SNAP-25    | Spo20p      | SNAP-24                 | CG9474    | 108209                                                                                               |                                                                | VDRC                                                       | No effect                                                                                            |
| SNAP-29    |             | ubisnap                 | CG11173   | JF01883<br>11173R-2                                                                                  | usnp RNAi<br>usnp RNAi/2                                       | BDSC/TRiP<br>NIG-Fly                                       | Small perinuclear dots<br>Small perinuclear dots                                                     |
| VAMP1      | Snc1p/Snc2p | n-synaptobrevin         | CG17248   | JF03417                                                                                              |                                                                | BDSC/TRiP                                                  | No effect                                                                                            |
| VAMP2      |             | Synaptobrevin           | CG12210   | 102922                                                                                               |                                                                | VDRC                                                       | No effect                                                                                            |
| VAMP3      |             |                         |           |                                                                                                      |                                                                |                                                            |                                                                                                      |
| VAMP4      |             |                         |           |                                                                                                      |                                                                |                                                            |                                                                                                      |
| VAMP5      |             |                         |           |                                                                                                      |                                                                |                                                            |                                                                                                      |
| VAMP7      |             | VAMP7                   | CG1599    | 1599R-1<br>P{EP}CG1<br>599[G7738]<br>Df(2R)BSC132                                                    | VAMP7 RNAi<br>VAMP7[EP]<br>VAMP7 Df                            | NIG-Fly<br>BDSC<br>BDSC                                    | Small perinuclear dots                                                                               |
| VAMP8      |             |                         |           |                                                                                                      |                                                                |                                                            |                                                                                                      |
| Ykt6       | Ykt6p       | Ykt6                    | CG1515    | 105648                                                                                               |                                                                | VDRC                                                       | Enhancement                                                                                          |
| Sec22a     |             |                         |           |                                                                                                      |                                                                |                                                            |                                                                                                      |
| Sec22b     | Sec22p      | Sec22a                  | CG7359    | 100766                                                                                               |                                                                | VDRC                                                       | No effect                                                                                            |
| Sec22c     |             |                         |           |                                                                                                      |                                                                |                                                            |                                                                                                      |
| Bet1       | Bet1p       | Bet1                    | CG14084   | 8420                                                                                                 |                                                                | VDRC                                                       | Suppression                                                                                          |
| GS15       | Sft1p       |                         |           |                                                                                                      |                                                                |                                                            |                                                                                                      |
| GS27       | Bos1p       | membrin                 | CG4780    | 109404                                                                                               |                                                                | VDRC                                                       | No effect                                                                                            |
| GS28       | Gos1p       | Gos28                   | CG7700    | 100289                                                                                               |                                                                | VDRC                                                       | No effect                                                                                            |
| Vti1a      | Vti1p       | Vti1                    | CG3279    | 45725<br>109819                                                                                      |                                                                | VDRC<br>VDRC                                               | No effect<br>No effect                                                                               |
| Vti1b      |             |                         | CG44009   |                                                                                                      |                                                                |                                                            |                                                                                                      |
| Slt1       | Slt1p/Use1p | Use1                    | CG14181   | 100019                                                                                               |                                                                | VDRC                                                       | No effect                                                                                            |
| Sec20      | Sec20p      | Sec20                   | CG2023    | 100264                                                                                               |                                                                | VDRC                                                       | No effect                                                                                            |

VDRC, Vienna Drosophila RNAi Center; BDSC, Bloomington Drosophila Stock Center; TRiP, Transgenic RNAi Project; DGRC, Drosophila Genetic Resource Center; NIG-Fly, National Institutes of Genetics fly stocks.
